# Supplementary material for: Non-BRCA DNA Damage Repair Gene Alterations and Response to the PARP Inhibitor Rucaparib in Metastatic Castration-Resistant Prostate Cancer: Analysis From the Phase II TRITON2 Study
Source: Oxford University Press journal article supplement (doi:10.1158/1078-0432.ccr-20-0394), 2020-02-21
Supplement: 10780432ccr200394-sup-236627_1_supp_6089403_q5lrzm.docx [file 10780432ccr200394-sup-236627_1_supp_6089403_q5lrzm.docx]

# SUPPLEMENTARY FIGURE LEGENDS

## Supplementary Figure S1.

Incidence of gene alteration types for patients from TRITON2 with non-*BRCA* DDR gene alterations.

## Supplementary Figure S2.

Summary of observed alterations in *ATM* (A), *CDK12* (B), and *CHEK2* (C).

## Supplementary Figure S3.

Change in PSA levels over time in patients with an *ATM* alteration (A), *CDK12* alteration (B), *CHEK2* alteration (C), or other DDR gene alteration (D). Patients with a PSA response are indicated with closed triangles; patients with a radiographic response are indicated with thicker lines. Abbreviation: PSA, prostate-specific antigen.
